# Supplementary material for: Enzymatic filter for improved separation of output signals in enzyme logic systems towards ‘sense and treat’ medicine
Source: Royal Society of Chemistry journal article supplement (doi:10.1039/c3bm60197h), 2013-10-17
Supplement: c3bm60197h.pdf [file c3bm60197h.pdf]

## Enzymatic Filter for Improved Separation of Output Signals in Enzyme Logic Systems towards ‘Sense and Treat’ Medicine

Shay Mailloux,<sup>a</sup> Oleksandr Zavalov,<sup>a</sup> Nataliia Guz,<sup>a</sup> Evgeny Katz,<sup>a</sup> Vera Bocharova<sup>\*b</sup>

<sup>a</sup> Department of Chemistry and Biomolecular Science, Clarkson University, Potsdam NY 13699-5810, USA,

<sup>b</sup> Chemical Sciences Division, Oak Ridge National Laboratory, Oak Ridge, Tennessee 37830-6197, USA,

\* Corresponding authors:

**E-mail:** bocharovav@ornl.gov ;

**Tel:** +1-(865)576-6490 ;

**Fax:** +1-(865)5744961;

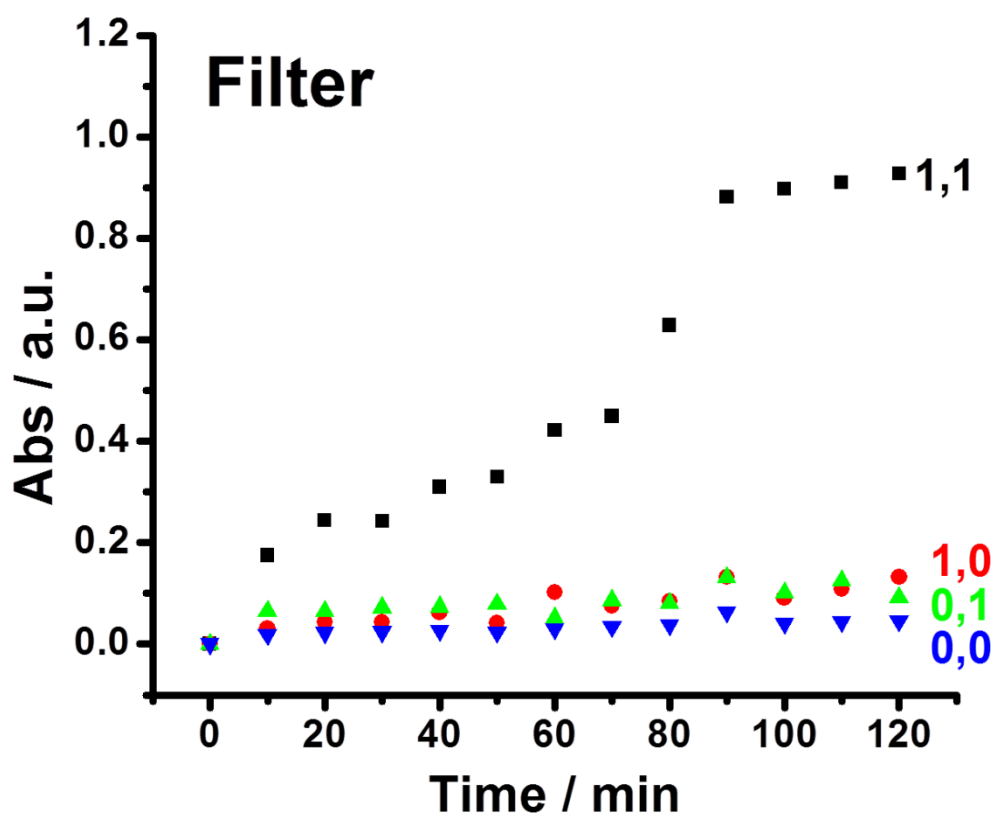

**Figure S1.** The kinetics of the production of citric acid from the biocatalytic cascade for all input combinations in the presence of the filter

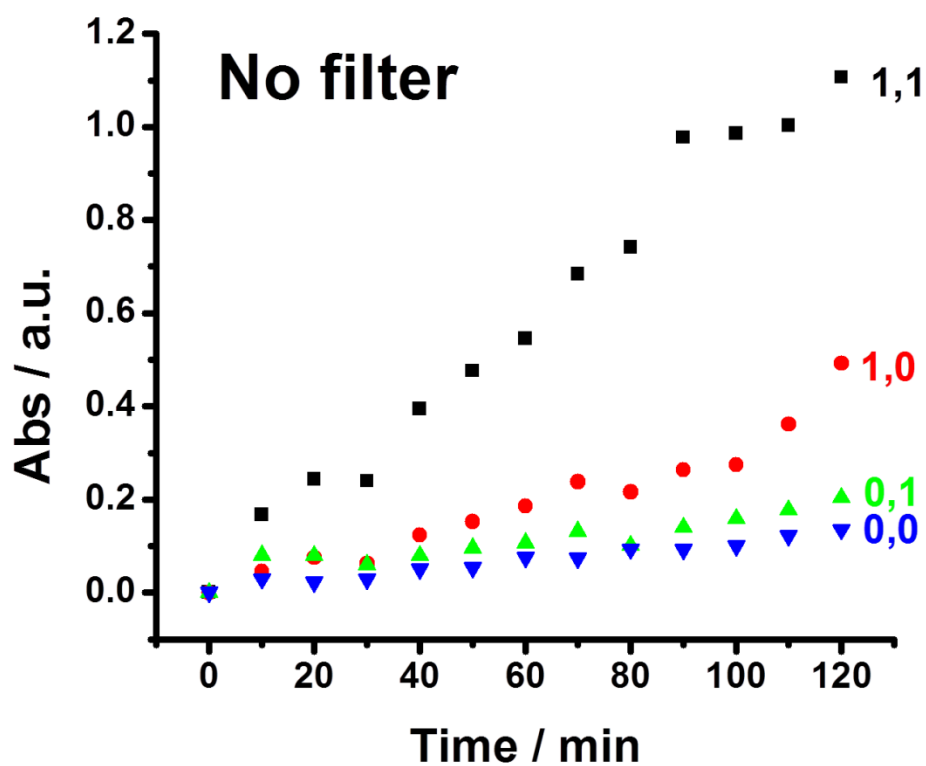

**Figure S2.** The kinetics of the production of citric acid from the biocatalytic cascade for all input combinations in the absence of the filter
